# Supplementary material
Source: publisher site journal article supplement (https://www.dovepress.com/article/307423)
Supplement: Supplementary file 1 [file get_supplementary_file.php]

**S1 Table** Comparison of characteristics of older adults aged ≥65 years who visited multiple Yoitoko checkups and those who visited only once, Hyogo, 2018-2019 (n=62)

|  | **Multiple visits (n = 16)** | **Single visit (n = 46)** |
| --- | --- | --- |
|  | **n (%)** | |
| Age - mean (SD) | 75.3 (4.7) | 73.5 (6.5) |
| Sex: malea | 6 (37.5) | 18 (40.0) |
| Present diseases | 12 (75.0) | 34 (73.9) |
| hypertension | 7 (43.8) | 15 (32.6) |
| hyperlipidemia | 4 (25.0) | 5 (10.9) |
| hyperuricemia | 0 (0.0) | 0 (0.0) |
| diabetes mellitus | 1 (6.3) | 7 (15.2) |
| cerebrovascular disease | 2 (12.5) | 4 (8.7) |
| heart disease | 4 (25.0) | 4 (8.7) |
| kidney disease | 2 (12.5) | 0 (0.0) |
| liver disease | 0 (0.0) | 3 (6.5) |
| depression | 2 (12.5) | 0 (0.0) |
| Number of diseases |  |  |
| one | 6 (37.5) | 21 (45.7) |
| two | 5 (31.3) | 9 (19.6) |
| ≥ three | 1 (6.3) | 4 (8.7) |
| Smoking statusb |  |  |
| never smoked | 10 (62.5) | 32 (72.7) |
| former smoker | 6 (37.5) | 9 (20.5) |
| current smoker | 0 (0.0) | 3 (6.8) |
| Currently employeda | 1 (6.3) | 11 (24.4) |
| Co-habitation | 14 (87.5) | 41 (89.1) |

**Notes:**

**Abbreviations:** SD, standard deviation.

a 1 person’s data were missing in single visits. b 2 person’s data were missing in single visits.
